# Supplementary material
Source: publisher figshare collection journal article supplement (https://springernature.figshare.com/ndownloader/files/22849802)
Supplement: Supplementary file 1 [file 22849802]

**Additional file 5:** Comparison of the prevalence of frequent pathogenic mutations observed in our cohort against the TCGA data and a Japanese cohort study (19-21)

**
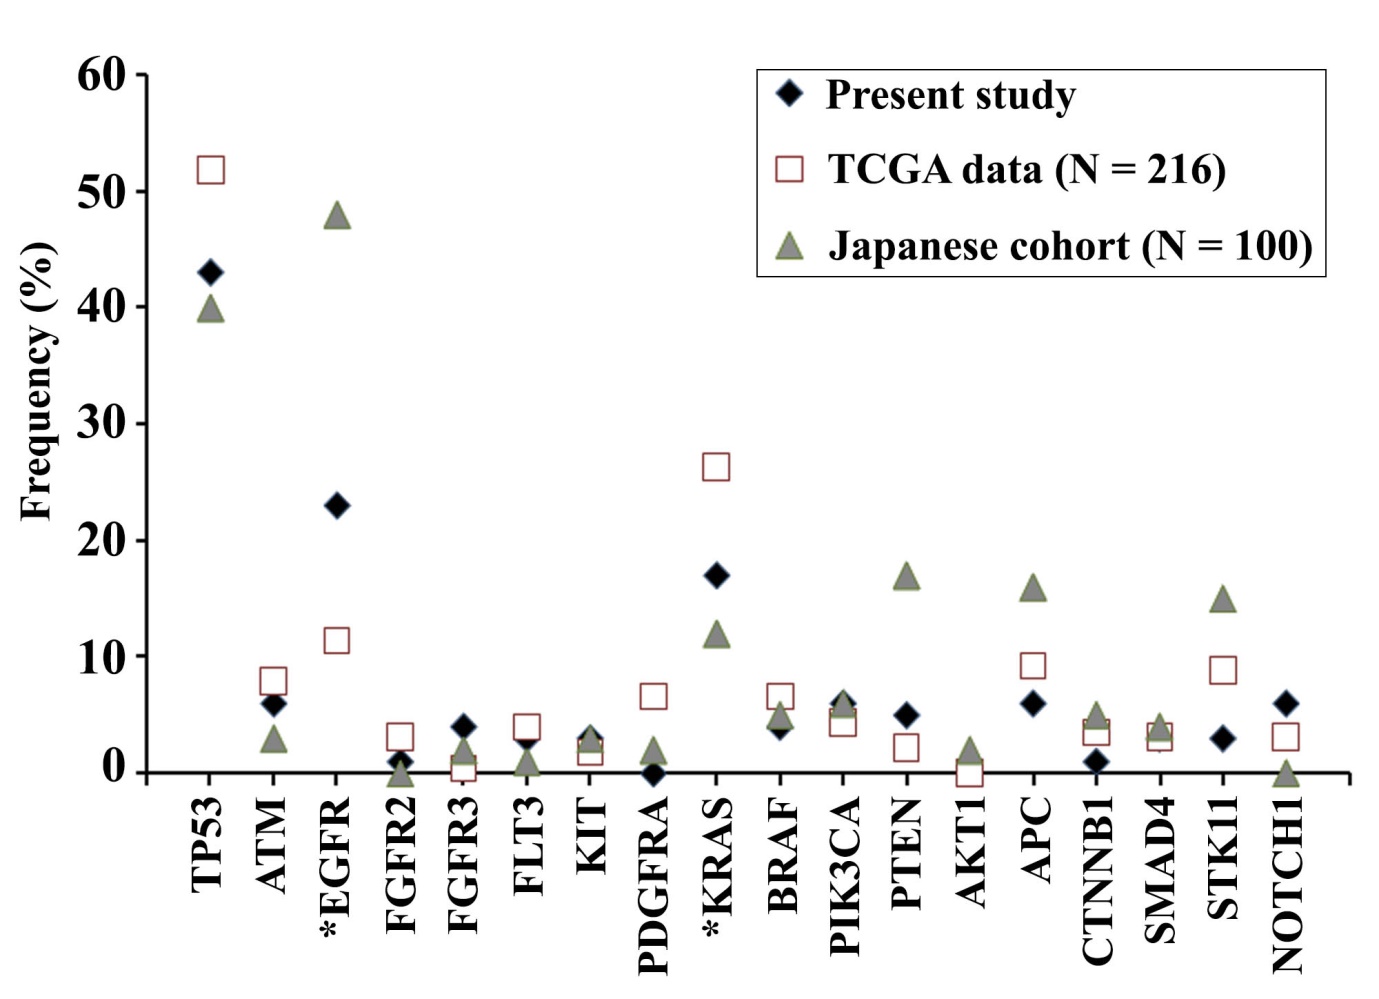
**

*****Differ significantly
